# Supplementary material for: Selected Schizosaccharomyces pombe Strains Have Characteristics That Are Beneficial for Winemaking
Source: PLoS One. 2016 Mar 23;11(3):e0151102. doi: 10.1371/journal.pone.0151102 (PMC4805284; doi:10.1371/journal.pone.0151102)
Supplement: S1 Table — (XLSX) [file pone.0151102.s001.xlsx]

## Sheet: Strains
		AceticAcid1	AceticAcid2	AceticAcid3	Acetic X	Acetic SD	Malic1	Malic2	Malic3	Malic X	Malic SD	G+F 1	G+F 2	G+F 3	G+F X	G+F SD
1	4	0.32	0.36	0.34	0.34	0.02	0.02	0.06	0.01	0.03	0.0264575	1.22	2.12	1.88	1.74	0.466047
2	22	0.72	0.66	0.68	0.686667	0.0305505	0.09	0	0.06	0.05	0.0458258	0.02	0.18	0.09	0.0966667	0.0802081
3	32	0.66	0.69	0.64	0.663333	0.0251661	0.04	0.06	0.02	0.04	0.02	0.05	0.04	0.12	0.07	0.043589
4	50	0.57	0.65	0.62	0.613333	0.0404145	0.01	0.1	0.05	0.0533333	0.0450925	0.06	0.08	0.06	0.0666667	0.011547
5	758	0.73	0.79	0.75	0.756667	0.0305505	0.02	0.04	0.01	0.0233333	0.0152753	0.1	0.02	0.09	0.07	0.043589
6	759	0.81	0.85	0.79	0.816667	0.0305505	0.09	0.01	0.02	0.04	0.043589	0.06	0.13	0.08	0.09	0.0360555
7	760	0.82	0.84	0.89	0.85	0.0360555	0	0.02	0.02	0.0133333	0.011547	1.13	0.32	0.12	0.523333	0.534821
8	762	0.5	0.59	0.54	0.543333	0.0450925	0.07	0.06	0.08	0.07	0.01	0.18	0.11	0.09	0.126667	0.0472582
9	837	0.32	0.27	0.28	0.29	0.0264575	0.03	0.01	0.05	0.03	0.02	0.27	0.11	0.14	0.173333	0.085049
10	838	0.56	0.48	0.52	0.52	0.04	0.02	0.05	0.03	0.0333333	0.0152753	0.38	0.08	0.06	0.173333	0.179258
11	840	0.51	0.54	0.49	0.513333	0.0251661	0.06	0.02	0	0.0266667	0.0305505	0.06	0.06	0.04	0.0533333	0.011547
12	841	0.67	0.61	0.62	0.633333	0.0321455	0	0.04	0.03	0.0233333	0.0208167	0.04	0.01	0.06	0.0366667	0.0251661
13	842	0.61	0.63	0.65	0.63	0.02	0.17	0.09	0.11	0.123333	0.0416333	0.03	0.06	0.05	0.0466667	0.0152753
14	845	0.52	0.48	0.54	0.513333	0.0305505	0.09	0.2	0.14	0.143333	0.0550757	0.02	0.04	0.05	0.0366667	0.0152753
15	846	0.47	0.53	0.54	0.513333	0.0378594	0.03	0.01	0.07	0.0366667	0.0305505	0.09	0.11	0.06	0.0866667	0.0251661
16	848	0.67	0.61	0.68	0.653333	0.0378594	0.03	0.05	0.01	0.03	0.02	0.02	0.04	0.02	0.0266667	0.011547
17	852	1.18	1.02	1.08	1.09333	0.080829	0.13	0.13	0.06	0.106667	0.0404145	0.08	0.02	0.05	0.05	0.03
18	853	1.21	1.16	1.12	1.16333	0.0450925	0.02	0.04	0	0.02	0.02	0.06	0.02	0.05	0.0433333	0.0208167
19	854	1.17	1.09	1.02	1.09333	0.0750555	0.05	0.03	0.06	0.0466667	0.0152753	0.01	0.08	0.02	0.0366667	0.0378594
20	858	0.51	0.48	0.54	0.51	0.03	0.02	0.06	0.01	0.03	0.0264575	0.18	0.22	0.08	0.16	0.072111
21	862	0.56	0.52	0.59	0.556667	0.0351188	0.14	0.22	0.18	0.18	0.04	0.52	2.15	1.48	1.38333	0.819288
22	864	0.46	0.49	0.54	0.496667	0.0404145	0.08	0.09	0.06	0.0766667	0.0152753	0.22	0.15	0.11	0.16	0.0556776
23	870	0.65	0.58	0.57	0.6	0.043589	0.02	0.04	0.03	0.03	0.01	0.02	0.06	0.04	0.04	0.02
24	872	0.73	0.68	0.71	0.706667	0.0251661	0.09	0.01	0.06	0.0533333	0.0404145	0.62	0.12	0.08	0.273333	0.300888
25	873	0.26	0.21	0.26	0.243333	0.0288675	0.02	0.02	0.02	0.02	0	0.02	0.04	0.01	0.0233333	0.0152753
26	874	0.58	0.52	0.51	0.536667	0.0378594	0	0.05	0.02	0.0233333	0.0251661	0.47	0.13	0.18	0.26	0.183576
27	875	0.5	0.56	0.54	0.533333	0.0305505	0.04	0	0.02	0.02	0.02	0.01	0.05	0.04	0.0333333	0.0208167
28	878	0.61	0.67	0.63	0.636667	0.0305505	0.02	0.07	0.03	0.04	0.0264575	0.06	0.08	0.02	0.0533333	0.0305505
29	879	0.7	0.75	0.68	0.71	0.0360555	0.02	0.04	0.03	0.03	0.01	0.02	0.09	0.03	0.0466667	0.0378594
30	884	0.96	1.02	1.04	1.00667	0.0416333	0.08	0.14	0.09	0.103333	0.0321455	0.05	0.07	0.03	0.05	0.02
31	899	0.22	0.22	0.25	0.23	0.0173205	0.01	0.03	0.02	0.02	0.01	0.05	0.02	0.04	0.0366667	0.0152753
32	900	0.78	0.81	0.84	0.81	0.03	0.04	0.1	0.09	0.0766667	0.0321455	0.1	0.08	0.06	0.08	0.02
33	902	0.62	0.54	0.56	0.573333	0.0416333	0.03	0	0.01	0.0133333	0.0152753	0.09	0.01	0.06	0.0533333	0.0404145
34	910	0.98	1.01	0.95	0.98	0.03	0.09	0.05	0.07	0.07	0.02	0.06	0.04	0.04	0.0466667	0.011547
35	913	0.67	0.72	0.69	0.693333	0.0251661	0	0.07	0.05	0.04	0.0360555	0.37	0.13	0.17	0.223333	0.128582
36	914	0.77	0.71	0.75	0.743333	0.0305505	0.06	0.08	0.02	0.0533333	0.0305505	0.04	0.11	0.08	0.0766667	0.0351188
37	916	0.45	0.43	0.49	0.456667	0.0305505	0.07	0.09	0.06	0.0733333	0.0152753	0.07	0.05	0.02	0.0466667	0.0251661
38	917	0.27	0.28	0.3	0.283333	0.0152753	0.05	0.04	0.02	0.0366667	0.0152753	0.03	0.05	0.04	0.04	0.01
39	918	0.82	0.76	0.86	0.813333	0.0503322	0.01	0.06	0.08	0.05	0.0360555	0.02	0.04	0	0.02	0.02
40	929	0.47	0.45	0.48	0.466667	0.0152753	0.01	0	0.03	0.0133333	0.0152753	0.06	0.05	0.08	0.0633333	0.0152753
41	930	0.53	0.55	0.56	0.546667	0.0152753	0	0.02	0.06	0.0266667	0.0305505	0.12	0.08	0.09	0.0966667	0.0208167
42	931	0.6	0.54	0.56	0.566667	0.0305505	0.03	0.04	0.02	0.03	0.01	0.07	0.04	0.06	0.0566667	0.0152753
43	934	1.34	1.43	1.39	1.38667	0.0450925	0.02	0	0.03	0.0166667	0.0152753	0.04	0.05	0.07	0.0533333	0.0152753
44	938	0.65	0.69	0.71	0.683333	0.0305505	0.04	0.03	0.01	0.0266667	0.0152753	0.09	0.11	0.12	0.106667	0.0152753
45	939	0.69	0.61	0.73	0.676667	0.061101	0.04	0.03	0.08	0.05	0.0264575	0.08	0.09	0.04	0.07	0.0264575
46	942	1.17	1.11	1.14	1.14	0.03	0.01	0.02	0.04	0.0233333	0.0152753	0.08	0.06	0.03	0.0566667	0.0251661
47	943	0.47	0.43	0.49	0.463333	0.0305505	0.13	0.14	0.17	0.146667	0.0208167	0.01	0	0.02	0.01	0.01
48	953	1.27	1.23	1.21	1.23667	0.0305505	0.03	0.06	0.04	0.0433333	0.0152753	0.12	0.08	0.06	0.0866667	0.0305505
		AceticAcid1	AceticAcid2	AceticAcid3	#DIV/0!	#DIV/0!	Malic1	Malic2	Malic3	#DIV/0!	#DIV/0!	G+F 1	G+F 2	G+F 3	#DIV/0!	#DIV/0!
49	1110	0.42	0.45	0.49	0.453333	0.0351188	0.72	0.68	0.76	0.72	0.04	0.05	0.01	0.12	0.06	0.0556776
50	1117	1.14	1.05	1.08	1.09	0.0458258	0.15	0.09	0.05	0.0966667	0.0503322	0.03	0.05	0.02	0.0333333	0.0152753
51	1154	0.55	0.46	0.52	0.51	0.0458258	0.08	0.05	0.02	0.05	0.03	0.04	0.03	0.17	0.08	0.0781025
52	1174	1.13	0.98	1.12	1.07667	0.083865	0.06	0.08	0.09	0.0766667	0.0152753	0.09	0.04	0.02	0.05	0.0360555
53	1180	0.78	0.84	0.86	0.826667	0.0416333	0.03	0.06	0.05	0.0466667	0.0152753	1.04	0.42	0.16	0.54	0.452106
54	1197	0.49	0.55	0.52	0.52	0.03	0.29	0.16	0.22	0.223333	0.0650641	0.54	0.12	0.35	0.336667	0.210317
55	1205	0.54	0.48	0.56	0.526667	0.0416333	0.18	0.32	0.21	0.236667	0.0737111	1.06	0.98	0.42	0.82	0.348712
56	1206	0.75	0.79	0.71	0.75	0.04	0.08	0.06	0.04	0.06	0.02	0.78	0.42	0.62	0.606667	0.18037
57	1207	0.43	0.48	0.46	0.456667	0.0251661	0.06	0.05	0.02	0.0433333	0.0208167	0.12	0.08	0.09	0.0966667	0.0208167
58	1468	0.5	0.52	0.56	0.526667	0.0305505	0	0.02	0.03	0.0166667	0.0152753	3.21	1.56	2.22	2.33	0.830482
59	1469	0.49	0.46	0.52	0.49	0.03	0.04	0.05	0.01	0.0333333	0.0208167	1.16	0.89	1.49	1.18	0.3005
60	1470	0.43	0.38	0.36	0.39	0.0360555	0.02	0	0.06	0.0266667	0.0305505	0.33	0.56	0.22	0.37	0.173494
61	1471	0.56	0.54	0.49	0.53	0.0360555	0.03	0.08	0.02	0.0433333	0.0321455	1.88	2.85	1.34	2.02333	0.765136
62	1472	0.46	0.52	0.53	0.503333	0.0378594	0.01	0.04	0.02	0.0233333	0.0152753	3.07	1.54	1.76	2.12333	0.827184
63	1473	0.55	0.63	0.58	0.586667	0.0404145	0.05	0.08	0.04	0.0566667	0.0208167	0.07	0.04	0.03	0.0466667	0.0208167
64	1474	0.64	0.72	0.67	0.676667	0.0404145	0.03	0.06	0.03	0.04	0.0173205	0.12	0.02	0.05	0.0633333	0.051316
65	1475	0.6	0.57	0.65	0.606667	0.0404145	0.06	0.04	0.05	0.05	0.01	0.37	0.42	0.46	0.416667	0.0450925
66	1476	0.65	0.58	0.67	0.633333	0.0472582	0.13	0.06	0.08	0.09	0.0360555	0.04	0.08	0.02	0.0466667	0.0305505
67	1477	0.54	0.47	0.52	0.51	0.0360555	0	0.04	0.02	0.02	0.02	0.02	0.01	0.04	0.0233333	0.0152753
68	1478	0.45	0.47	0.53	0.483333	0.0416333	0.08	0.12	0	0.0666667	0.061101	0.12	0.06	0.07	0.0833333	0.0321455
69	1479	0.57	0.59	0.54	0.566667	0.0251661	0.11	0.06	0.16	0.11	0.05	0.09	0.11	0.05	0.0833333	0.0305505
70	1480	0.48	0.51	0.55	0.513333	0.0351188	0.07	0.04	0.09	0.0666667	0.0251661	0.03	0.06	0.01	0.0333333	0.0251661
71	1481	0.58	0.56	0.6	0.58	0.02	0.11	0.07	0.13	0.103333	0.0305505	0.04	0.03	0.02	0.03	0.01
72	1482	0.45	0.56	0.48	0.496667	0.0568624	0.05	0.02	0.06	0.0433333	0.0208167	0.07	0.05	0.08	0.0666667	0.0152753
73	1483	0.46	0.49	0.52	0.49	0.03	0.03	0.06	0.08	0.0566667	0.0251661	0.11	0.06	0.04	0.07	0.0360555
74	1484	0.82	0.76	0.78	0.786667	0.0305505	0.06	0.05	0.04	0.05	0.01	0.04	0.06	0.02	0.04	0.02
75	1741	0.5	0.48	0.54	0.506667	0.0305505	0.02	0.01	0.04	0.0233333	0.0152753	0.05	0.08	0.01	0.0466667	0.0351188
871 y 1433 no crecio
872 y 1433 did not growth

## Sheet: MalicAcidDegradationRate
		Malic1	Malic2	Malic3	Malic X	Malic SD		Initial Malic Acid Content	Residual content of malic acid in %	Degradation Rate
1	4	0.02	0.06	0.01	0.03	0.0264575		4	0.75	99.25
2	22	0.09	0	0.06	0.05	0.0458258			1.25	98.75
3	32	0.04	0.06	0.02	0.04	0.02			1	99
4	50	0.01	0.1	0.05	0.0533333	0.0450925			1.33333	98.6667
5	758	0.02	0.04	0.01	0.0233333	0.0152753			0.583333	99.4167
6	759	0.09	0.01	0.02	0.04	0.043589			1	99
7	760	0	0.02	0.02	0.0133333	0.011547			0.333333	99.6667
8	762	0.07	0.06	0.08	0.07	0.01			1.75	98.25
9	837	0.03	0.01	0.05	0.03	0.02			0.75	99.25
10	838	0.02	0.05	0.03	0.0333333	0.0152753			0.833333	99.1667
11	840	0.06	0.02	0	0.0266667	0.0305505			0.666667	99.3333
12	841	0	0.04	0.03	0.0233333	0.0208167			0.583333	99.4167
13	842	0.17	0.09	0.11	0.123333	0.0416333			3.08333	96.9167
14	845	0.09	0.2	0.14	0.143333	0.0550757			3.58333	96.4167
15	846	0.03	0.01	0.07	0.0366667	0.0305505			0.916667	99.0833
16	848	0.03	0.05	0.01	0.03	0.02			0.75	99.25
17	852	0.13	0.13	0.06	0.106667	0.0404145			2.66667	97.3333
18	853	0.02	0.04	0	0.02	0.02			0.5	99.5
19	854	0.05	0.03	0.06	0.0466667	0.0152753			1.16667	98.8333
20	858	0.02	0.06	0.01	0.03	0.0264575			0.75	99.25
21	862	0.14	0.22	0.18	0.18	0.04			4.5	95.5
22	864	0.08	0.09	0.06	0.0766667	0.0152753			1.91667	98.0833
23	870	0.02	0.04	0.03	0.03	0.01			0.75	99.25
24	872	0.09	0.01	0.06	0.0533333	0.0404145			1.33333	98.6667
25	873	0.02	0.02	0.02	0.02	0			0.5	99.5
26	874	0	0.05	0.02	0.0233333	0.0251661			0.583333	99.4167
27	875	0.04	0	0.02	0.02	0.02			0.5	99.5
28	878	0.02	0.07	0.03	0.04	0.0264575			1	99
29	879	0.02	0.04	0.03	0.03	0.01			0.75	99.25
30	884	0.08	0.14	0.09	0.103333	0.0321455			2.58333	97.4167
31	899	0.01	0.03	0.02	0.02	0.01			0.5	99.5
32	900	0.04	0.1	0.09	0.0766667	0.0321455			1.91667	98.0833
33	902	0.03	0	0.01	0.0133333	0.0152753			0.333333	99.6667
34	910	0.09	0.05	0.07	0.07	0.02			1.75	98.25
35	913	0	0.07	0.05	0.04	0.0360555			1	99
36	914	0.06	0.08	0.02	0.0533333	0.0305505			1.33333	98.6667
37	916	0.07	0.09	0.06	0.0733333	0.0152753			1.83333	98.1667
38	917	0.05	0.04	0.02	0.0366667	0.0152753			0.916667	99.0833
39	918	0.01	0.06	0.08	0.05	0.0360555			1.25	98.75
40	929	0.01	0	0.03	0.0133333	0.0152753			0.333333	99.6667
41	930	0	0.02	0.06	0.0266667	0.0305505			0.666667	99.3333
42	931	0.03	0.04	0.02	0.03	0.01			0.75	99.25
43	934	0.02	0	0.03	0.0166667	0.0152753			0.416667	99.5833
44	938	0.04	0.03	0.01	0.0266667	0.0152753			0.666667	99.3333
45	939	0.04	0.03	0.08	0.05	0.0264575			1.25	98.75
46	942	0.01	0.02	0.04	0.0233333	0.0152753			0.583333	99.4167
47	943	0.13	0.14	0.17	0.146667	0.0208167			3.66667	96.3333
48	953	0.03	0.06	0.04	0.0433333	0.0152753			1.08333	98.9167
		Malic1	Malic2	Malic3	#DIV/0!	#DIV/0!			#DIV/0!	#DIV/0!
49	1110	0.72	0.68	0.76	0.72	0.04			18	82
50	1117	0.15	0.09	0.05	0.0966667	0.0503322			2.41667	97.5833
51	1154	0.08	0.05	0.02	0.05	0.03			1.25	98.75
52	1174	0.06	0.08	0.09	0.0766667	0.0152753			1.91667	98.0833
53	1180	0.03	0.06	0.05	0.0466667	0.0152753			1.16667	98.8333
54	1197	0.29	0.16	0.22	0.223333	0.0650641			5.58333	94.4167
55	1205	0.18	0.32	0.21	0.236667	0.0737111			5.91667	94.0833
56	1206	0.08	0.06	0.04	0.06	0.02			1.5	98.5
57	1207	0.06	0.05	0.02	0.0433333	0.0208167			1.08333	98.9167
58	1468	0	0.02	0.03	0.0166667	0.0152753			0.416667	99.5833
59	1469	0.04	0.05	0.01	0.0333333	0.0208167			0.833333	99.1667
60	1470	0.02	0	0.06	0.0266667	0.0305505			0.666667	99.3333
61	1471	0.03	0.08	0.02	0.0433333	0.0321455			1.08333	98.9167
62	1472	0.01	0.04	0.02	0.0233333	0.0152753			0.583333	99.4167
63	1473	0.05	0.08	0.04	0.0566667	0.0208167			1.41667	98.5833
64	1474	0.03	0.06	0.03	0.04	0.0173205			1	99
65	1475	0.06	0.04	0.05	0.05	0.01			1.25	98.75
66	1476	0.13	0.06	0.08	0.09	0.0360555			2.25	97.75
67	1477	0	0.04	0.02	0.02	0.02			0.5	99.5
68	1478	0.08	0.12	0	0.0666667	0.061101			1.66667	98.3333
69	1479	0.11	0.06	0.16	0.11	0.05			2.75	97.25
70	1480	0.07	0.04	0.09	0.0666667	0.0251661			1.66667	98.3333
71	1481	0.11	0.07	0.13	0.103333	0.0305505			2.58333	97.4167
72	1482	0.05	0.02	0.06	0.0433333	0.0208167			1.08333	98.9167
73	1483	0.03	0.06	0.08	0.0566667	0.0251661			1.41667	98.5833
74	1484	0.06	0.05	0.04	0.05	0.01			1.25	98.75
75	1741	0.02	0.01	0.04	0.0233333	0.0152753			0.583333	99.4167
871 y 1433 no crecio
872 y 1433 did not growth
